# Supplementary material for: Light-at-night exposure affects brain development through pineal allopregnanolone-dependent mechanisms
Source: eLife. 2019 Sep 30;8:e45306. doi: 10.7554/eLife.45306 (PMC6850767; doi:10.7554/eLife.45306)
Supplement: Figure 1—source data 1. [file elife-45306-fig1-data1.xlsx]

## Sheet: Sheet1
	Figure 1a							Figure 1b							Figure 1c
	LD							LL							LAN
	ZT0	ZT4	ZT8	ZT12	ZT16	ZT20		ZT0	ZT4	ZT8	ZT12	ZT16	ZT20		ZT0	ZT4	ZT8	ZT12	ZT16	ZT20
	0.00382	0.00499	0.00359	0.00318	0.00795	0.00492		0.00297	0.00307	0.00336	0.00173	0.00257	0.0047		0.00149	0.00142	0.00374	0.00275	0.00371	0.00389
	0.00529	0.00312	0.00234	0.00443	0.0075	0.00687		0.00147	0.00314	0.00547	0.00241	0.00342	0.00674		0.00441	0.00431	0.00152	0.00241	0.00358	0.00466
	0.00494	0.00286	0.00447	0.00382	0.00585	0.00466		0.0037	0.00265	0.00279	0.00362	0.00126	0.00295		0.00531	0.0027	0.00237	0.00194	0.00347	0.00294
	0.00305	0.00272	0.00381	0.00314	0.00561	0.0044		0.00248	0.00362	0.0034	0.0022	0.00454	0.00451		0.00355	0.00107	0.00111	0.00251	0.00222	0.00267
	0.00431	0.00353	0.00338	0.00464	0.0075	0.00526		0.00473	0.00228	0.00174	0.00406	0.00324	0.00372		0.00231	0.00268	0.00302	0.00205	0.00452	0.00688
	0.00477	0.00403	0.00174	0.00329	0.00646	0.00694		0.0049	0.00173	0.00179	0.00394	0.00392	0.00564		0.00245	0.00393	0.00273	0.00376	0.00251	0.00288
	0.00391	0.0035	0.00378	0.00293	0.00487	0.0041		0.00232	0.00323	0.00449	0.00352	0.0047	0.00318		0.00217	0.00532	0.0052	0.00254	0.00469	0.00559
	0.00324	0.00362	0.00245	0.00488	0.00803	0.00467		0.00464	0.00181	0.00419	0.00243	0.00145	0.00445		0.00261	0.00524	0.00145	0.00373	0.00356	0.00445
	0.00323	0.00455	0.00256	0.00266	0.00764	0.00592		0.00146	0.00278	0.00378	0.00134	0.00398	0.00521		0.00184	0.00156	0.00423	0.00431	0.00222	0.00366
	0.00418	0.00328	0.00256	0.00349	0.00651	0.00426		0.0032	0.00317	0.00484	0.00516	0.00501	0.00243		0.00383	0.00277	0.00331	0.00206	0.00055	0.00795
	Figure 1d				Figure 1e
	ALLO synthesis				ALLO concentration
	LD	LL	LAN		LD	LL	LAN
	1277.44	640.32	657.24		148.92	110.27	82.32
	757.82	558.63	499.34		102.23	59.47	6.79
	1228.03	328.43	581.72		69.9	17.82	54.12
	993.86	632.09	323.09		77.8	98.17	36.17
	1008.28	439.26	760.73		59.59	63.01	63.83
	1069.26	426.34	526.66		117.94	22.02	21.64
	1217.24	410.74	789.71		79.6	53.72	46.62
	1258.5	258.58	421.82		133.94	41.65	34.55
	822.37	374.72	820.33		106.04	6.89	18.2
	948.27	458.62	534.93		112.38	43.79	40.57
