# Supplementary material for: Light-at-night exposure affects brain development through pineal allopregnanolone-dependent mechanisms
Source: eLife. 2019 Sep 30;8:e45306. doi: 10.7554/eLife.45306 (PMC6850767; doi:10.7554/eLife.45306)
Supplement: Figure 2—figure supplement 1—source data 1. [file elife-45306-fig2-figsupp1-data1.xlsx]

## Sheet: Sheet1
	Figure 2-figure supplement 1a				Figure 2-figure supplement 1b
	1 wk				3 wks
	Lobe 4				Lobe 4
	LD	LL	LAN		LD	LL	LAN
	102	166	170		3056	2716	2544
	86	154	135		3278	2657	3157
	134	136	151		2958	3043	2835
	88	131	187		3250	2962	2770
	125	132	178		3110	2610	2675
	114	138	190		2979	2746	2539
	123	165	106		3112	2631	2888
	108	166	197		3062	3055	3089
	91	110	168		3281	3196	2966
	90	172	115		2913	2696	2901
