# Supplementary material for: Light-at-night exposure affects brain development through pineal allopregnanolone-dependent mechanisms
Source: eLife. 2019 Sep 30;8:e45306. doi: 10.7554/eLife.45306 (PMC6850767; doi:10.7554/eLife.45306)
Supplement: Figure 2—figure supplement 2—source data 1. [file elife-45306-fig2-figsupp2-data1.xlsx]

## Sheet: Sheet1
	Figure 2 - figure supplement 2
	LD	LL	LAN
	567	568	585
	564	565	587
	567	578	555
	571	574	579
	580	577	577
	590	583	568
	555	580	576
	547	573	583
	562	584	560
	571	542	562
