# Supplementary material for: Light-at-night exposure affects brain development through pineal allopregnanolone-dependent mechanisms
Source: eLife. 2019 Sep 30;8:e45306. doi: 10.7554/eLife.45306 (PMC6850767; doi:10.7554/eLife.45306)
Supplement: Figure 2—source data 1. [file elife-45306-fig2-data1.xlsx]

## Sheet: Sheet1
	Figure 2c
	1 wk				1 wk				1 wk				1 wk				1 wk				1 wk				1 wk				1 wk				1 wk				1 wk
	Lobe 1				Lobe 2				Lobe 3				Lobe 4				Lobe 5				Lobe 6				Lobe 7				Lobe 8				Lobe 9				Lobe 10
	LD	LL	LAN		LD	LL	LAN		LD	LL	LAN		LD	LL	LAN		LD	LL	LAN		LD	LL	LAN		LD	LL	LAN		LD	LL	LAN		LD	LL	LAN		LD	LL	LAN
	15	24	21		45	41	44		22	88	85		128	157	137		197	277	296		165	187	139		85	138	139		88	82	96		72	70	68		54	28	36
	27	19	27		51	49	21		26	66	87		92	122	192		227	314	244		152	171	97		133	137	91		65	62	65		65	62	58		28	55	48
	18	25	31		47	27	42		73	54	53		89	139	131		233	275	330		114	117	162		89	107	78		76	66	62		69	77	51		47	41	44
	30	29	6		28	28	93		15	62	123		92	162	197		186	234	235		93	103	129		93	96	101		65	58	64		68	64	62		40	51	15
	32	29	12		27	51	29		35	138	58		120	140	145		235	249	232		115	139	111		106	88	95		69	72	75		63	54	60		32	26	38
	29	31	34		15	28	53		53	55	42		114	121	148		217	260	248		139	164	147		101	82	105		63	84	52		65	70	59		54	48	43
	10	25	26		35	49	39		84	81	149		132	125	138		227	266	278		146	141	93		100	96	110		74	100	59		65	60	63		47	36	32
	16	5	24		60	38	78		33	65	94		77	215	115		273	230	272		130	139	133		84	118	105		82	82	78		62	61	66		64	49	13
	18	11	24		22	80	98		63	76	80		109	133	144		208	269	219		69	99	141		101	75	143		78	69	68		56	65	64		60	63	23
	16	16	15		44	50	50		82	74	95		114	167	173		235	216	281		126	89	110		102	120	128		57	66	61		61	68	60		46	24	57
	Figure 2e
	3 wks				3 wks				3 wks				3 wks				3 wks				3 wks				3 wks				3 wks				3 wks				3 wks
	Lobe 1				Lobe 2				Lobe 3				Lobe 4				Lobe 5				Lobe 6				Lobe 7				Lobe 8				Lobe 9				Lobe 10
	LD	LL	LAN		LD	LL	LAN		LD	LL	LAN		LD	LL	LAN		LD	LL	LAN		LD	LL	LAN		LD	LL	LAN		LD	LL	LAN		LD	LL	LAN		LD	LL	LAN
	712	722	701		1827	1768	1793		2387	2054	2162		2966	2737	2718		6214	6299	5915		7046	7402	6909		3505	3447	3689		3176	3177	3246		3424	3155	3131		1339	1468	1455
	767	699	715		1828	1789	1778		2423	2134	2228		3101	2891	2707		6507	6029	6207		7293	7002	7127		3631	3731	3606		3266	3142	3223		3302	3218	3189		1630	1556	1356
	753	697	699		1812	1841	1792		2421	2159	2152		3202	2877	2716		6211	6007	6079		7234	7552	7112		3594	3370	3208		3190	3261	3073		3215	3433	3408		1733	1551	1594
	716	708	681		1839	1757	1732		2364	2147	2333		2954	2677	2725		6003	6228	5930		7661	7063	7280		3417	3608	3369		3118	3043	3378		3212	3288	3255		1749	1721	1729
	759	718	712		1755	1823	1745		2403	2185	2169		3044	2702	2666		6404	6553	6179		6986	7089	7002		3489	3292	3422		3296	3249	3133		3191	2974	3337		1858	1791	1767
	710	687	687		1765	1794	1738		2305	2308	2058		2831	2930	2578		6209	5967	5818		7275	7397	7355		3871	3637	3615		3104	2980	3179		3523	3132	3590		1294	1519	1446
	689	720	714		1847	1781	1744		2364	2174	2194		2925	2696	2860		6378	5994	6052		7796	7271	7490		3867	3455	3445		3232	3370	3026		3257	3286	3427		1660	1554	1326
	714	731	726		1748	1724	1783		2329	2167	2100		3011	2966	2769		6394	5688	5902		7323	7535	6730		3674	3477	3683		3359	3171	3212		3379	3184	3116		1548	1779	1642
	702	733	683		1827	1743	1830		2270	2191	2011		3201	2928	2694		6169	6191	6340		7367	6890	7122		3519	3523	3704		3173	3120	3101		3183	2953	2905		1469	1338	1769
	704	695	700		1835	1750	1791		2186	2191	2274		2982	2678	2879		6137	6115	5526		7078	7129	7105		3781	3509	3517		3441	3425	3007		3104	3454	3149		1736	1632	1609
	Figure 2g
	10 wks			10 wks			10 wks			10 wks			10 wks			10 wks			10 wks			10 wks			10 wks			10 wks
	Lobe 1			Lobe 2			Lobe 3			Lobe 4			Lobe 5			Lobe 6			Lobe 7			Lobe 8			Lobe 9			Lobe 10
	LD	LAN		LD	LAN		LD	LAN		LD	LAN		LD	LAN		LD	LAN		LD	LAN		LD	LAN		LD	LAN		LD	LAN
	1513	1421		2183	2156		2732	2433		3611	2867		6117	5880		10025	9183		3348	3427		3068	2811		2826	2898		1697	1596
	1585	1696		2372	2247		2937	2767		3702	3305		5865	5767		10127	8091		3573	2831		3128	2867		2954	2887		1699	1507
	1670	1538		2425	2477		2859	2750		3693	3648		6049	5601		8521	8747		3824	3817		2982	3077		2981	2704		1531	1514
	1550	1472		2464	2185		2869	2588		3751	3485		5941	5549		9749	8131		3630	3387		2845	2855		2916	3146		1618	1531
	1481	1709		2175	2294		2862	2613		3695	3579		5775	5779		9068	8614		3689	3835		2867	2777		2995	3057		1482	1409
	1591	1582		2275	2195		2967	2487		3591	3509		6121	5364		9076	9397		3467	3731		2964	2936		2551	2650		1534	1631
	1374	1496		2266	2484		2700	2353		3629	3195		6030	5531		8957	8429		3472	3651		3034	2932		2851	2815		1602	1621
	1448	1590		2118	2451		2635	2594		3697	3100		5810	5429		8631	8991		3534	3495		2902	3047		3038	2966		1548	1753
	1458	1441		2312	2160		2698	2710		3716	3065		5903	5844		8929	9111		3880	3588		3101	2881		2928	2609		1443	1485
	1671	1572		2388	2145		2655	2698		3474	3269		5876	5716		8773	8925		3751	3332		3045	2967		2973	2707		1513	1418
