# Supplementary material for: Light-at-night exposure affects brain development through pineal allopregnanolone-dependent mechanisms
Source: eLife. 2019 Sep 30;8:e45306. doi: 10.7554/eLife.45306 (PMC6850767; doi:10.7554/eLife.45306)
Supplement: Figure 3—source data 1. [file elife-45306-fig3-data1.xlsx]

## Sheet: Sheet1
	Figure 3b				Figure 3c
	1 wk				3 wks
	Lobe 4				Lobe 4
	LD	LAN	LAN+ALLO		LD	LAN	LAN+ALLO
	104	179	120		3198	2825	2915
	115	132	96		3023	2847	3157
	155	115	156		3661	3054	3070
	81	132	125		2954	2929	3076
	103	197	96		3259	2716	3174
	110	100	104		2840	2627	3036
	136	137	99		3110	2701	2959
	145	179	137		3334	2836	3104
	89	112	87		3110	2570	3197
	75	139	95		2903	2672	3178
