# Supplementary material for: Light-at-night exposure affects brain development through pineal allopregnanolone-dependent mechanisms
Source: eLife. 2019 Sep 30;8:e45306. doi: 10.7554/eLife.45306 (PMC6850767; doi:10.7554/eLife.45306)
Supplement: Figure 4—source data 1. [file elife-45306-fig4-data1.xlsx]

## Sheet: Sheet1
	Figure 4b					Figure 4c					Figure 4d					Figure 4e
	mPRa					mPRb					mPRg					a1-subunit
	Control	si-control	si-mPRa	si-mPRa +ALLO		Control	si-control	si-mPRb	si-mPRb +ALLO		Control	si-control	si-mPRg	si-mPRg +ALLO		Control	isoALLO	isoALLO +ALLO
	84	117	144	198		95	97	107	105		95	124	110	98		86	112	106
	89	108	162	174		97	122	165	128		98	132	106	96		107	92	99
	129	96	215	172		99	103	125	134		114	97	138	96		104	87	116
	94	94	186	132		125	94	118	96		108	80	122	125		123	103	118
	97	93	172	148		99	88	99	134		99	106	117	122		116	129	102
	96	98	155	139		116	110	138	98		92	102	115	116		97	92	128
	104	106	119	141		110	128	98	115		96	110	102	96		115	113	118
	95	92	190	164		96	104	141	117		129	96	134	91		101	98	86
	98	121	166	188		109	99	131	98		86	99	94	92		105	114	92
	114	93	139	162		92	96	92	113		116	128	121	96		93	111	95
