# Supplementary material for: Light-at-night exposure affects brain development through pineal allopregnanolone-dependent mechanisms
Source: eLife. 2019 Sep 30;8:e45306. doi: 10.7554/eLife.45306 (PMC6850767; doi:10.7554/eLife.45306)
Supplement: Figure 5—source data 1. [file elife-45306-fig5-data1.xlsx]

## Sheet: Sheet1
	Figure 5a
	PACAP				BDNF				NT-3				3b-HSD
	Control	Px	Px+ALLO		Control	Px	Px+ALLO		Control	Px	Px+ALLO		Control	Px	Px+ALLO
	1.0847	0.33899	1.24766		1.13025	0.70054	0.86047		0.84647	1.30069	0.89932		1.0451	0.97062	0.97124
	0.82569	0.75786	0.8464		0.86943	0.89234	0.7314		0.85844	1.27353	1.19744		1.01825	1.03994	0.93075
	1.03127	0.47497	1.10765		1.17328	0.68185	0.5967		1.0742	1.23002	1.13387		1.0305	1.16777	1.24768
	0.89368	0.78496	1.32657		0.92767	0.62542	0.62767		0.97147	1.10475	0.96538		0.88906	0.94753	0.95371
	1.11122	0.61391	0.9612		1.24239	1.04377	0.41634		0.81396	0.968	0.95557		0.8701	1.07085	1.31293
	0.87332	0.23874	1.13577		0.82307	0.55085	0.63228		1.23618	1.3061	0.89265		1.0346	1.1943	1.24354
	0.91073	0.45404	1.32325		0.90485	0.64245	0.8596		1.06895	1.20113	1.21925		0.97927	1.32216	0.96345
	1.02661	0.51743	0.99217		1.01104	0.90725	0.97408		1.17897	1.14332	1.30122		1.03147	0.99085	0.88284
	1.21444	0.57753	0.99632		1.0497	0.53031	0.73585		1.06852	0.96769	1.03911		0.96544	1.06224	1.11649
	1.02831	0.67843	1.24717		0.86897	0.8717	0.51554		0.98318	0.92908	1.1045		1.23517	1.26929	1.18847
	P450arom				Dio2				IGF-1
	Control	Px	Px+ALLO		Control	Px	Px+ALLO		Control	Px	Px+ALLO
	1.36462	1.14748	1.32261		1.08675	1.0055	1.00211		1.02083	1.04068	1.18727
	0.94496	0.84635	1.12811		1.02981	0.90207	1.34055		1.05717	1.18623	1.01748
	0.87335	1.27982	1.31519		0.96155	1.04918	1.06482		1.37867	1.10701	1.05094
	0.93686	0.93566	0.89566		1.23383	1.18846	1.20832		0.91785	0.75451	1.38268
	1.04747	0.97327	0.99245		0.81942	0.88407	0.87468		0.94955	0.88221	0.82708
	1.0613	0.81742	1.23228		1.1454	0.93193	1.26573		1.24008	0.78046	1.21734
	1.17247	1.22591	1.04795		0.82898	1.13776	0.99108		0.77795	0.99808	1.11428
	0.80913	1.22792	1.19579		1.073	0.71989	0.83382		0.93276	1.16588	1.14591
	1.06072	1.17871	1.22341		0.86035	0.94935	1.25783		0.85121	0.81818	0.91608
	0.72941	1.32842	0.98257		0.96088	0.74372	0.70965		0.87288	1.18953	0.89342
	Figure 5b
	LD							LAN
	ZT0	ZT4	ZT8	ZT12	ZT16	ZT20		ZT0	ZT4	ZT8	ZT12	ZT16	ZT20
	0.00176	0.00168	0.00121	0.00152	0.00354	0.00294		0.00121	0.00146	0.0009	0.00086	0.00092	0.00079
	0.00191	0.00174	0.00116	0.00186	0.00351	0.00277		0.00049	0.00149	0.00085	0.0009	0.00077	0.00084
	0.00182	0.00133	0.00129	0.00167	0.00272	0.00247		0.00082	0.00089	0.00087	0.00086	0.00133	0.00048
	0.00171	0.00138	0.00092	0.0016	0.00285	0.00273		0.00129	0.00125	0.00121	0.00078	0.00144	0.00065
	0.00209	0.00131	0.00143	0.00181	0.00348	0.00317		0.00146	0.00097	0.00082	0.00094	0.00078	0.00062
	0.00165	0.00162	0.00147	0.0013	0.00323	0.00283		0.00113	0.00134	0.00103	0.00098	0.00097	0.00058
	0.00159	0.00158	0.00095	0.00137	0.00281	0.00307		0.00141	0.00152	0.00087	0.00133	0.00167	0.00116
	0.00155	0.00177	0.00098	0.00189	0.00326	0.00364		0.00128	0.00083	0.00103	0.0009	0.00138	0.00067
	0.00181	0.00162	0.00094	0.00204	0.00246	0.00276		0.00092	0.00125	0.00074	0.00126	0.00189	0.00104
	0.00184	0.0013	0.00093	0.00163	0.00366	0.00288		0.00136	0.00097	0.00084	0.00116	0.00122	0.00056
	Figure 5c					Figure 5d
	Control	Px	Px+ALLO	Px+PACAP		Control	Px	Px+ALLO	Px+PACAP
	121	128	96	95		3300	1570	2216	2499
	114	97	100	97		2761	1966	2432	2614
	84	92	108	98		3496	2167	2522	2786
	90	147	97	71		3538	1692	2794	2592
	95	126	119	108		3104	2081	2377	3029
	96	106	80	106		3224	1518	2298	2460
	111	107	85	88		3125	1510	2450	3357
	85	162	122	116		2832	2048	3000	2565
	121	123	90	89		3232	1610	2680	2901
	98	144	115	90		2678	1311	2443	3116
