# Supplementary material for: Light-at-night exposure affects brain development through pineal allopregnanolone-dependent mechanisms
Source: eLife. 2019 Sep 30;8:e45306. doi: 10.7554/eLife.45306 (PMC6850767; doi:10.7554/eLife.45306)
Supplement: Figure 6—source data 1. [file elife-45306-fig6-data1.xlsx]

## Sheet: Sheet1
	Figure 6b				Figure 6c
	Caspase-3				Purkinje cells
	Control	LAN	LAN+ALLO		Control	LAN	LAN+ALLO
	90	145	148		2864	3000	2800
	123	149	201		3002	2961	2579
	98	165	151		3227	2620	2884
	72	143	119		2848	2793	2637
	78	171	180		3184	2691	2805
	77	134	155		3136	2673	2591
	94	156	139		3251	2777	2566
	139	137	160		2916	2612	2804
	135	129	126		2713	2919	2983
	90	133	149		3177	2768	2991
