# Supplementary material for: Light-at-night exposure affects brain development through pineal allopregnanolone-dependent mechanisms
Source: eLife. 2019 Sep 30;8:e45306. doi: 10.7554/eLife.45306 (PMC6850767; doi:10.7554/eLife.45306)
Supplement: Figure 7—source data 1. [file elife-45306-fig7-data1.xlsx]

## Sheet: Sheet1
	Figure 7b				Figure 7c
	Caspase-3				Purkinje cells
	LD	LAN	LAN+PACAP		LD	LAN	LAN+PACAP
	111	145	109		2718	2701	2968
	98	147	99		2965	2598	3211
	98	184	83		3219	2666	3378
	89	147	110		2933	2892	2897
	93	149	98		2981	2434	2901
	101	105	115		3123	2743	3071
	107	153	119		2781	2677	2799
	128	116	89		3020	2866	2735
	77	134	75		3009	2590	3069
	98	155	83		2961	2904	2987
	Figure 7e				Figure 7f
	Caspase-3				Purkinje cells
	LD	LAN	LAN+PACAP		LD	LAN	LAN+PACAP
	89	127	81		3000	2687	3017
	98	126	53		3010	2419	3117
	93	118	64		3201	2844	3077
	105	93	74		2899	2681	2999
	106	97	97		2990	2809	3288
	102	127	111		2911	2879	3002
	99	102	82		3121	2941	3143
	84	134	108		2845	2840	2892
	82	146	78		2904	2752	3149
	117	102	110		2857	2955	2950
