# Supplementary material for: Light-at-night exposure affects brain development through pineal allopregnanolone-dependent mechanisms
Source: eLife. 2019 Sep 30;8:e45306. doi: 10.7554/eLife.45306 (PMC6850767; doi:10.7554/eLife.45306)
Supplement: Figure 8—source data 1. [file elife-45306-fig8-data1.xlsx]

## Sheet: Sheet1
	Figure 8a				Figure 8b
	Control	Px	Px+ALLO		P1	P7	P14	P21
	1.2108	1.001	0.965		0.00317	0.001769	0.000777	0.002177
	0.5448	1.0083	0.6309		0.004604	0.002203	0.000226	0.001489
	1.0841	0.8362	0.2135		0.005197	0.0032	0.000767	0.002328
	1.1623	0.2308	0.7169		0.005257	0.003564	0.000948	0.001188
	1.0014	0.8069	1.0785		0.005136	0.002464	0.001526	0.002011
	1.4434	0.7797	0.9499		0.006257	0.004194	0.000867	0.001956
	0.9192	0.077	1.1164		0.00343	0.00333	0.001426	0.00099
	0.5812	0.3514	0.8431		0.005283	0.002688	0.001421	0.002189
	1.015	0.5267	0.8847		0.004976	0.000931	0.000979	0.001896
	1.2892	0.5754	1.0069		0.002859	0.001858	0.001125	0.000151
