# Supplementary material for: Light-at-night exposure affects brain development through pineal allopregnanolone-dependent mechanisms
Source: eLife. 2019 Sep 30;8:e45306. doi: 10.7554/eLife.45306 (PMC6850767; doi:10.7554/eLife.45306)
Supplement: Figure 9—source data 1. [file elife-45306-fig9-data1.xlsx]

## Sheet: Sheet1
	Figure 9a
	H3K9me3			H3K27me3			H4K20me3
	1st	2nd		1st	2nd		1st	2nd
	28.59	37.48		13.97	14.29		12.49	8.65
	21.41	44.67		14.95	16.25		4.6	3.97
	19.17	29.84		11.91	8.56		3.22	9.38
	21.76	30.13		13.56	14.08		7.7	6.47
	17.12	34.22		19.45	15.44		9.45	9.86
	15.76	28.33		8.66	14.63		7.07	7.11
	16.77	49.17		11.25	14.36		9.12	11.08
	13.01	34.59		12.84	10.01		9.47	5.87
	22.71	38.48		18.72	19.41		6.51	8.14
	20.63	40.2		11.93	11.25		7.99	7.59
	Figure 9c
	H3K9me3
	1st	2nd
	22.47	44.35
	18.73	51
	20.37	40.22
	23.62	36.5
	13.37	34.83
	12.52	41.92
	16.97	33.15
	26.13	35.41
	32.1	37.27
	17.72	47.04
