# Supplementary material for: Light-at-night exposure affects brain development through pineal allopregnanolone-dependent mechanisms
Source: eLife. 2019 Sep 30;8:e45306. doi: 10.7554/eLife.45306 (PMC6850767; doi:10.7554/eLife.45306)
Supplement: Figure 10—source data 1. — Link to datasets: https://doi.org/10.5061/dryad.k6g8b53. [file elife-45306-fig10-data1.xlsx]

## Sheet: Sheet1
	Figure 10a				Figure 10b
	LD	LAN	LAN+ALLO		Control	Px	Px+ALLO
	40.23	45.73	22.25		25.75	55.32	45.72
	38.15	30.25	35.61		30.64	47.76	36.32
	28.5	44.36	34.56		27.77	63.33	43.4
	30.28	42.18	30.1		25.22	46.81	38.31
	24.34	36.01	15.7		26.9	57.86	47.37
	37.43	38.64	26.8		33.15	30.27	24.57
	33.47	33.91	35.77		14.43	48.57	39.69
	22.69	37.2	29.16		32.17	41.13	43.95
	28.61	40.11	41.73		42.16	51.92	18.68
	31.42	46.27	42.72		15.29	35.45	37.33
